# Supplementary material
Source: MDPI journal article supplement (https://www.mdpi.com/1424-2818/15/2/276)
Supplement: s1 [file s1]

Supplemental Table S1. Estimated fragmentation of Peruvian primate taxa distributions. Red highlights taxa with > 50% fragmented habitat.

| Taxa                                     | Distribution Km <sup>2</sup> | % Distribution Fragmented | IUCN Status |
|------------------------------------------|------------------------------|---------------------------|-------------|
| <i>Alouatta palliata aequatorialis</i>   | 358                          | 11.9                      | VU          |
| <i>Alouatta puruensis</i>                | 6,421                        | 17.7                      | VU          |
| <i>Alouatta seniculus</i>                | 135,039                      | 23.4                      | LC          |
| <i>Aotus azarae boliviensis</i>          | 12,736                       | 45.5                      | DD          |
| <i>Aotus miconax</i>                     | 17,480                       | 63.2                      | EN          |
| <i>Aotus nigriceps</i>                   | 68,099                       | 30.1                      | LC          |
| <i>Aotus nancymae</i>                    | 86,156                       | 33.3                      | VU          |
| <i>Aotus vociferans</i>                  | 26,342                       | 12.9                      | LC          |
| <i>Ateles belzebuth</i>                  | 44,524                       | 22.5                      | EN          |
| <i>Ateles chamek</i>                     | 134,673                      | 33.4                      | EN          |
| <i>Cacajao calvus ucayalii</i>           | 35,152                       | 20.3                      | VU          |
| <i>Callimico goeldii</i>                 | 88,752                       | 23.0                      | VU          |
| <i>Cebuella (pygmaea) niveiventris</i>   | 59,974                       | 22.3                      | VU          |
| <i>Cebuella (pygmaea) pygmaea</i>        | 24,636                       | 11.7                      | VU          |
| <i>Cebus aequatorialis</i>               | 246                          | 13.2                      | CR          |
| <i>Cebus cucinus</i>                     | 9,294                        | 41.8                      | NT          |
| <i>Cebus unicolor</i>                    | 61,760                       | 21.2                      | VU          |
| <i>Cebus yuracus</i>                     | 103,805                      | 27.3                      | NT          |
| <i>Cheracebus lucifer</i>                | 9,543                        | 10.6                      | LC          |
| <i>Lagothrix flavicauda</i>              | 15,375                       | 63.6                      | CR          |
| <i>Lagothrix (lagotricha) lagotricha</i> | 7,631                        | 10.0                      | VU          |
| <i>Lagothrix (lagotricha) poeppigii</i>  | 78,914                       | 22.0                      | EN          |
| <i>Lagothrix (lagotricha) tschudii</i>   | 83,371                       | 35.4                      | DD          |
| <i>Leontocebus fuscicollis</i>           | 1,368                        | 15.3                      | LC          |
| <i>Leontocebus illigeri</i>              | 34,431                       | 35.1                      | NT          |
| <i>Leontocebus lagonotus</i>             | 21,788                       | 15.1                      | LC          |
| <i>Leontocebus leucogenys</i>            | 59,402                       | 56.0                      | LC          |

|                                            |         |      |                                |
|--------------------------------------------|---------|------|--------------------------------|
| <i>Leontocebus nigricolis graellsii</i>    | 258     | 5.2  | NT                             |
| <i>Leontocebus nigricollis nigricollis</i> | 5,432   | 8.0  | LC                             |
| <i>Leontocebus nigrifrons</i>              | 7,984   | 16.7 | LC                             |
| <i>Leontocebus tripartitus</i>             | 781     | 10.0 | NT                             |
| <i>Leontocebus weddelli melanoleucus</i>   | 436     | 12.4 | LC                             |
| <i>Leontocebus weddelli weddelli</i>       | 50,834  | 28.4 | LC                             |
| <i>Pithecia aequatorialis</i>              | 8,447   | 15.5 | LC                             |
| <i>Pithecia hirsuta</i>                    | 7,350   | 11.0 | DD                             |
| <i>Pithecia inusta</i>                     | 60,513  | 47.8 | LC                             |
| <i>Pithecia irrorata</i>                   | 20,473  | 28.4 | DD                             |
| <i>Pithecia isabella</i>                   | 8,136   | 25.1 | DD                             |
| <i>Pithecia monachus</i>                   | 13,643  | 19.8 | LC                             |
| <i>Pithecia napensis</i>                   | 9,931   | 12.9 | LC                             |
| <i>Pithecia rylandsi</i>                   | 3,497   | 43.5 | VU                             |
| <i>Plecturocebus aureipalatii</i>          | 338     | 14.6 | LC                             |
| <i>Plecturocebus cupreus</i>               | 27,919  | 19.7 | LC                             |
| <i>Plecturocebus discolor</i>              | 95,240  | 30.8 | LC                             |
| <i>Plecturocebus oenanthe</i>              | 6,973   | 76.5 | CR                             |
| <i>Plecturocebus toppini</i>               | 16,291  | 19.8 | LC                             |
| <i>Plecturocebus urubambensis</i>          | 33,643  | 44.9 | LC                             |
| <i>Saguinus imperator imperator</i>        | 1,117   | 14.5 | LC                             |
| <i>Saguinus imperator subgriseus</i>       | 22,646  | 21.8 | LC                             |
| <i>Saguinus labiatus labiatus</i>          | 1,652   | 45.3 | LC                             |
| <i>Saguinus mystax mystax</i>              | 46,017  | 21.6 | LC                             |
| <i>Saimiri boliviensis boliviensis</i>     | 98,642  | 34.2 | LC                             |
| <i>Saimiri boliviensis peruviansis</i>     | 81,001  | 43.4 | LC                             |
| <i>Saimiri cassiquiarensis macrodon</i>    | 78,268  | 21.3 | LC                             |
| <i>Sapagus macrocephalus</i>               | 179,975 | 27.3 | LC (As <i>Sapajus apella</i> ) |

Supplemental Table S2. Details of layers used for GIS based assessments.

| Layer                                | Format (Cell size for raster layers)         | Source                                                                                                                                                                                                                                                                                                             |
|--------------------------------------|----------------------------------------------|--------------------------------------------------------------------------------------------------------------------------------------------------------------------------------------------------------------------------------------------------------------------------------------------------------------------|
| Primate distributions                | ESRI Polygon Shapefile                       | IUCN Red List - <a href="https://www.iucnredlist.org/resources/files/3551b381-e6cf-48a7-8ae0-ef8869f4ad84">https://www.iucnredlist.org/resources/files/3551b381-e6cf-48a7-8ae0-ef8869f4ad84</a>                                                                                                                    |
|                                      |                                              | All the worlds primates - <a href="https://alltheworldsprimates.org/Home.aspx">https://alltheworldsprimates.org/Home.aspx</a>                                                                                                                                                                                      |
|                                      |                                              | S. Shanee un-published data                                                                                                                                                                                                                                                                                        |
| Forest degradation/<br>Deforestation | GeoTIFF (30x30 m)                            | Perú, Ministerio del Ambiente - <a href="https://www.datosabiertos.gob.pe/dataset/%C3%A1reas-degradadas-brecha-nacional-ministerio-del-ambiente">https://www.datosabiertos.gob.pe/dataset/%C3%A1reas-degradadas-brecha-nacional-ministerio-del-ambiente</a>                                                        |
| Towns and villages                   | ESRI Point Shapefile                         | Perú, Instituto Nacional de Estadística e Informática<br><a href="https://www.geogpsperu.com/2017/08/descarga-gratis-centros-poblados-censo.html">https://www.geogpsperu.com/2017/08/descarga-gratis-centros-poblados-censo.html</a>                                                                               |
| Urban centres                        | ESRI Polygon Shapefile                       | Perú, Ministerio de Educación                                                                                                                                                                                                                                                                                      |
| Roads                                | ESRI Polyline Shapefile                      | United Nations Office for the Coordination of Humanitarian Affairs (Open Street Map) - <a href="http://export.hotosm.org/downloads/b6f1ae17-8a4a-472a-b4f2-a0904196a06f/hotosm_per_roads_lines_shp.zip">http://export.hotosm.org/downloads/b6f1ae17-8a4a-472a-b4f2-a0904196a06f/hotosm_per_roads_lines_shp.zip</a> |
| Petrol concessions                   | ESRI Polygon Shapefile                       | Perú, PETROPERU - <a href="https://drive.google.com/open?id=1-p9wVww0rJAW0F0A9hgPAhDd-ryaQYDZ">https://drive.google.com/open?id=1-p9wVww0rJAW0F0A9hgPAhDd-ryaQYDZ</a>                                                                                                                                              |
| Mining concessions                   | ESRI Polygon Shapefile                       | Perú, Ministerio de Energía y Minas                                                                                                                                                                                                                                                                                |
| Forestry concessions<br>(Timber)     | ESRI Polygon Shapefile                       | Perú, Ministerio del Ambiente - <a href="https://drive.google.com/open?id=1N4tU8-jsIEJeKozPOTv584JzoCqKfDXB">https://drive.google.com/open?id=1N4tU8-jsIEJeKozPOTv584JzoCqKfDXB</a>                                                                                                                                |
| Forestry concessions<br>(NTFP)       | ESRI Polygon Shapefile                       | Perú, Ministerio del Ambiente - <a href="https://drive.google.com/open?id=1N4tU8-jsIEJeKozPOTv584JzoCqKfDXB">https://drive.google.com/open?id=1N4tU8-jsIEJeKozPOTv584JzoCqKfDXB</a>                                                                                                                                |
| Temperature<br>(Current/Historic)    | GeoTIFF (30 arc seconds, ~1km <sup>2</sup> ) | WorldClim - <a href="http://biogeo.ucdavis.edu/data/worldclim/v2.1/base/wc2.1_30s_tavg.zip">http://biogeo.ucdavis.edu/data/worldclim/v2.1/base/wc2.1_30s_tavg.zip</a>                                                                                                                                              |
| Temperature (Future)                 | GeoTIFF (30 arc seconds, ~1km <sup>2</sup> ) | WorldClim - <a href="https://www.worldclim.org/data/v1.4/cmip5_30s.html">https://www.worldclim.org/data/v1.4/cmip5_30s.html</a>                                                                                                                                                                                    |
| Precipitation<br>(Current/Historic)  | GeoTIFF (30 arc seconds, ~1km <sup>2</sup> ) | WorldClim - <a href="http://biogeo.ucdavis.edu/data/worldclim/v2.1/base/wc2.1_30s_prec.zip">http://biogeo.ucdavis.edu/data/worldclim/v2.1/base/wc2.1_30s_prec.zip</a>                                                                                                                                              |
| Precipitation (Future)               | GeoTIFF (30 arc seconds, ~1km <sup>2</sup> ) | WorldClim - <a href="https://www.worldclim.org/data/v1.4/cmip5_30s.html">https://www.worldclim.org/data/v1.4/cmip5_30s.html</a>                                                                                                                                                                                    |

Supplemental Table S3. Taxa and specialists primarily responsible for non-GIS based assessments (All other taxa evaluated with GIS by Shane, Nestor Allgas and Lorena Fernandez).

| Taxa                                   | Specialist assessors                              |
|----------------------------------------|---------------------------------------------------|
| <i>Alouatta palliata aequatorialis</i> | Zoila Vega, Cindy Huertado, Alvaro García Olachea |
| <i>Aotus miconax</i>                   | Sam Shane, Nestor Allgas, Lorena Fernandez        |
| <i>Ateles belzebuth</i>                | Sam Shane, Nestor Allgas, Lorena Fernandez        |
| <i>Ateles chamek</i>                   | Raul Bello Santa Cruz                             |
| <i>Cacajao calvus ucayalii</i>         | Mark Bowler                                       |
| <i>Callimico goeldii</i>               | Mrinalini Erkenwick Watsa                         |
| <i>Cebus aequatorialis</i>             | Zoila Vegas, Cindy Hurtado, Alvaro García Olachea |
| <i>Cebus yuracus</i>                   | Sam Shane, Nestor Allgas, Lorena Fernandez        |
| <i>Cheracebus lucifer</i>              | Gabriel Garcia Mendoza                            |
| <i>Lagothrix flavicauda</i>            | Sam Shane, Nestor Allgas, Lorena Fernandez        |
| <i>Leontocebus leucogenys</i>          | Sam Shane, Nestor Allgas, Lorena Fernandez        |
| <i>Leontocebus weddelli weddelli</i>   | Mrinalini Erkenwick Watsa                         |
| <i>Pithecia aequatorialis</i>          | Gabriel Garcia Mendoza                            |
| <i>Pithecia discolor</i>               | Gabriel Garcia Mendoza                            |
| <i>Pithecia hirsuta</i>                | Gabriel Garcia Mendoza                            |
| <i>Pithecia monachus</i>               | Gabriel Garcia Mendoza                            |
| <i>Pithecia napensis</i>               | Gabriel Garcia Mendoza                            |
| <i>Plecturocebus oenanthe</i>          | Sam Shane, Nestor Allgas, Lorena Fernandez        |
| <i>Saguinus imperator imperator</i>    | Mrinalini Erkenwick Watsa                         |
| <i>Saguinus imperator subgrisecens</i> | Mrinalini Erkenwick Watsa                         |
